## ■ CORRESPONDENCE

Anesthesiology  
78:1187, 1993  
© 1993 American Society of Anesthesiologists, Inc.  
J. B. Lippincott Company, Philadelphia

### Concentration Ranges in Dose-Response Determinations for Propofol and Thiopental *In Vitro*

*To the Editor:*—Recently, Park *et al.* noted the absence of contractile response by rat aortic and pulmonary arterial rings exposed to concentrations of propofol ranging from 30 to 300  $\mu\text{M}$ .<sup>1</sup> Their work revealed a statistically significant concentration-dependent relaxation response. Introna *et al.* have reported that lower propofol concentrations cause an endothelium-independent constriction of canine coronary artery rings across a range of  $10^{-8}$  M (10 nM) to  $10^{-5}$  M (10  $\mu\text{M}$ ),<sup>2</sup> the latter concentration approaching the initial concentration used by Park *et al.* to establish a propofol dose-response curve.

In addition, Park *et al.* did not observe significant effects of thiopental upon aortic tissues within a concentration range of 10–100  $\mu\text{M}$ . We have noted a biphasic response to thiopental in endothelium-denuded canine coronary artery rings, both untreated (Bridges *et al.*)<sup>\*</sup> and pretreated with serotonin.<sup>3</sup> Thiopental concentrations of 100 nM–100  $\mu\text{M}$  caused ring contraction, and ring relaxation was seen at higher concentrations. Our observations were similar to those of Hatano and colleagues, who demonstrated increased contractile responses in a variety of canine arteries using thiopental concentrations ranging from 10  $\mu\text{M}$  to 1 mM.<sup>4</sup>

Multiple variables affect the *in vivo* milieu, including physiochemical properties such as protein binding, lipid solubility, and pKa, as well as the pharmacokinetic profile of the drug. This makes it difficult to correlate *in vivo* with *in vitro* studies, as well as to infer specific tissue drug levels across a relatively narrow concentration range. Clinically relevant concentrations of thiopental have been estimated at 40–350  $\mu\text{M}$ ,<sup>5</sup> and those of propofol at 16–22  $\mu\text{M}$  (maintenance infusion) and >35  $\mu\text{M}$  (bolus).<sup>6</sup> The study by Park *et al.* approximated this range (10–100  $\mu\text{M}$  thiopental and 30–300  $\mu\text{M}$  propofol).<sup>1</sup> However, we have observed a biphasic response in coronary rings across a wider concentration range of thiopental (100 nM–1 mM),<sup>3</sup> and Introna and colleagues have demonstrated a contractile response at propofol levels of 10 nM up to 10  $\mu\text{M}$ , with relaxation at higher doses.<sup>3</sup> It is possible that vasodilation might follow a bolus dose of propofol, with vasoconstriction occurring at lower concentrations (*i.e.*, maintenance blood levels).

These studies contain differences in animal species, vascular tissue type, and experimental technique. Still, we maintain that important effects of these two drugs, such as the biphasic contraction/relaxation response we have observed, may be overlooked if one is limited to a relatively narrow concentration range. It would seem prudent to

expand the dose range to include both higher and lower concentrations, considering the difficulty of extrapolating from *in vitro* to *in vivo* and from animal to human tissue and considering the pharmacokinetic and physiochemical complexities involved.

**M. Truett Bridges, Jr., M.D.**  
Resident in Anesthesiology

**Robert P. S. Introna, M.D.**  
Associate Professor of Anesthesiology

**Jack K. Pruett, Ph.D.**  
Professor of Anesthesiology  
Department of Anesthesiology  
Medical College of Georgia  
Augusta, Georgia 30912

### References

1. Park WK, Lynch C II, Johns RA: Effects of propofol and thiopental in isolated cat aorta and pulmonary artery. *ANESTHESIOLOGY* 77:956–963, 1992
2. Introna RPS, Pruett JK, Yodlowski EH, Grover E: Direct effects of propofol (2,6-diisopropylphenol) on canine coronary artery ring tension. *Gen Pharmacol* (in press)
3. Introna RPS, Pruett JK, Martin DC, Josephson D, Manabe M: Effects of sodium pentothal and sufentanil on serotonin induced constriction of canine coronary artery rings without endothelium. *Gen Pharmacol* 22:589–594, 1991
4. Hatano Y, Nakamura K, Moriyama S, Mori K, Toda N: The contractile responses of isolated dog cerebral and extracerebral arteries to oxybarbiturates and thiobarbiturates. *ANESTHESIOLOGY* 71:80–86, 1989
5. Hung OR, Varvel J, Shafer S, Stanski DR: Quantitation of thiopental anaesthetic depth with clinical stimuli. *Can J Anaesth* 37:S18, 1990
6. Lapage JM, Pinaud ML, Helias JH, Cozian AY, Normand YL, Sorron RJ: Left ventricular performance during propofol or methohexital anesthesia: Isotopic and invasive cardiac monitoring. *Anesth Analg* 73:3–9, 1991

\* Bridges MT, Introna RPS, Pruett JK: Direct effects of thiopental on endothelium-denuded canine coronary artery rings. Unpublished data.

(Accepted for publication March 2, 1993.)
